# Supplementary material for: A novel triple aqua-, phenoxo- and carboxylato-bridged dinickel(ii) complex, its magnetic properties, and comparative biomimetic catalytic studies with analogous dinickel(ii) complexes
Source: Royal Society of Chemistry journal article supplement (doi:10.1039/d1nj00708d), 2021-01-01
Supplement: d1nj00708d1.pdf [file d1nj00708d1.pdf]

## Supporting Information

### **A novel triple aqua, phenoxo and carboxylato bridged dinickel(II) complex and its magnetic and comparative biomimetic catalytic studies with analogous dinickel(II) complexes**

Narayan Ch. Jana,<sup>a</sup> Zvonko Jagličić,<sup>b</sup> Paula Brandão,<sup>c</sup> Sarmistha Adak,<sup>a,d</sup> Amrita Saha<sup>e</sup> and Anangamohan Panja\*<sup>a,d</sup>

<sup>a</sup> *Department of Chemistry, Panskura Banamali College, Panskura RS, WB 721152, India*

<sup>b</sup> *Institute of Mathematics, Physics and Mechanics & Faculty of Civil and Geodetic Engineering, University of Ljubljana, Jadranska 19, 1000 Ljubljana, Slovenia*

<sup>c</sup> *Department of Chemistry, CICECO-Aveiro Institute of Materials, University of Aveiro, 3810-193 Aveiro, Portugal*

<sup>d</sup> *Department of Chemistry, Gokhale Memorial Girls' College, 1/1 Harish Mukherjee Road, Kolkata-700020, India.*

<sup>e</sup> *Department of Chemistry, Jadavpur University, Kolkata- 700032, India*

\* Corresponding author e-mail: ampanja@yahoo.co.in

**Table S1.** Selected bond angles (°) for complexes **1–3**.

| <b>Bond Angles</b> | <b>1</b>  | <b>2</b>  | <b>3</b>  |
|--------------------|-----------|-----------|-----------|
| Ni1–O1–Ni2         | 101.77(6) | 100.30(4) | 104.72(6) |
| Ni1–O2–Ni2         | 106.32(7) | 101.25(4) | 93.30(6)  |
| O2–Ni1–N1          | 152.58(6) | 166.87(4) | 164.45(6) |
| O2–Ni1–O1          | 76.02(5)  | 78.19(4)  | 77.60(6)  |
| N1–Ni1–O1          | 89.36(6)  | 88.69(4)  | 86.93(6)  |
| O2–Ni1–N2          | 91.31(6)  | 97.73(4)  | 99.62(6)  |
| N1–Ni1–N2          | 96.44(6)  | 95.37(4)  | 95.71(7)  |
| O1–Ni1–N2          | 161.53(6) | 172.59(4) | 175.29(6) |
| O2–Ni1–N3          | 100.94(6) |           |           |
| N1–Ni1–N3          | 104.31(6) |           |           |
| O1–Ni1–N3          | 99.41(6)  |           |           |
| N2–Ni1–N3          | 96.14(6)  |           |           |
| N1–Ni1–N7          |           | 89.56(5)  |           |
| O2–Ni1–N7          |           | 91.49(4)  |           |
| N7–Ni1–O1          |           | 96.62(4)  |           |
| N7–Ni1–N2          |           | 89.63(5)  |           |
| N1–Ni1–N8          |           | 87.76(5)  |           |
| O2–Ni1–N8          |           | 92.22(4)  |           |
| N7–Ni1–N8          |           | 174.46(5) |           |
| O1–Ni1–N8          |           | 88.16(4)  |           |
| N2–Ni1–N8          |           | 85.81(5)  |           |
| O3–Ni1–O1          |           |           | 92.47(6)  |
| O3–Ni1–N1          |           |           | 88.49(6)  |
| O3–Ni1–O5          |           |           | 178.62(6) |
| O1–Ni1–O5          |           |           | 88.90(6)  |
| N1–Ni1–O5          |           |           | 91.38(6)  |
| O3–Ni1–N2          |           |           | 91.50(7)  |
| O5–Ni1–N2          |           |           | 87.14(7)  |
| O3–Ni1–O2          |           |           | 93.75(6)  |
| O5–Ni1–O2          |           |           | 86.75(6)  |
| O2–Ni2–O1          | 75.85(5)  | 80.20(4)  | 76.01(6)  |
| O2–Ni2–N4          | 155.36(6) | 169.01(4) | 94.45(7)  |
| O1–Ni2–N4          | 88.62(6)  | 89.52(4)  | 86.99(6)  |
| O2–Ni2–N5          | 91.25(6)  | 97.41(4)  | 89.45(7)  |
| O1–Ni2–N5          | 158.47(6) | 107.51(4) | 165.26(7) |
| N4–Ni2–N5          | 97.10(7)  | 89.37(5)  | 96.63(7)  |
| O2–Ni2–N6          | 101.22(6) |           | 169.83(6) |
| O1–Ni2–N6          | 102.27(6) |           | 100.01(6) |
| N4–Ni2–N6          | 100.71(6) |           | 94.68(7)  |
| N5–Ni2–N6          | 97.05(7)  |           | 93.94(7)  |
| N4–Ni2–N9          |           | 94.40(5)  |           |
| N9–Ni2–O1          |           | 152.74(4) |           |
| N9–Ni2–O2          |           | 93.01(4)  |           |
| N9–Ni2–N5          |           | 99.51(5)  |           |
| O1–Ni2–O4          |           |           | 90.10(6)  |
| N4–Ni2–O4          |           |           | 176.60(7) |
| O4–Ni2–N5          |           |           | 85.75(7)  |
| O4–Ni2–N6          |           |           | 87.56(6)  |
| O4–Ni2–O2          |           |           | 83.12(6)  |

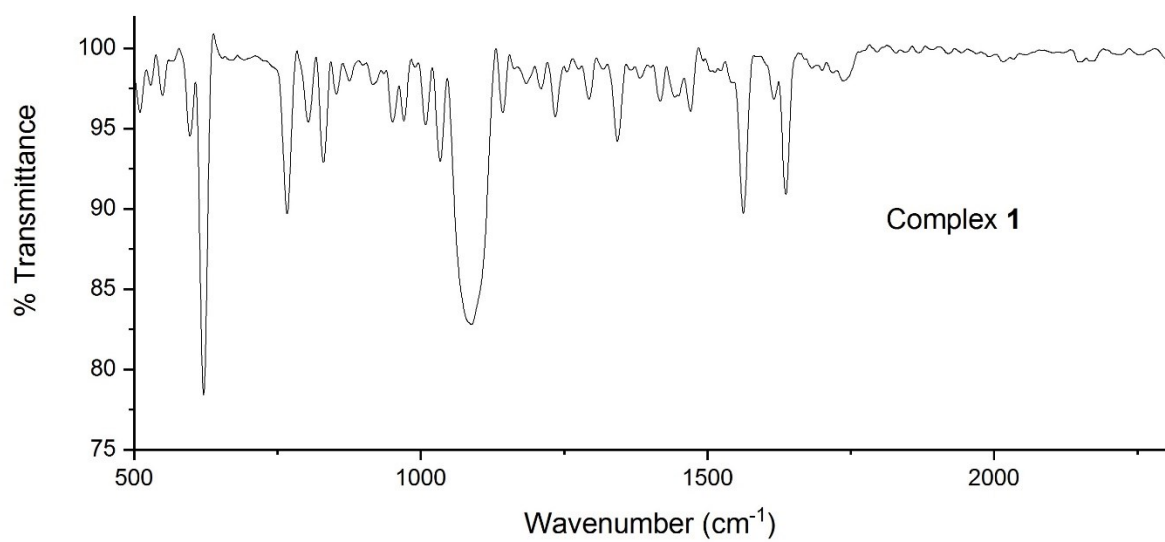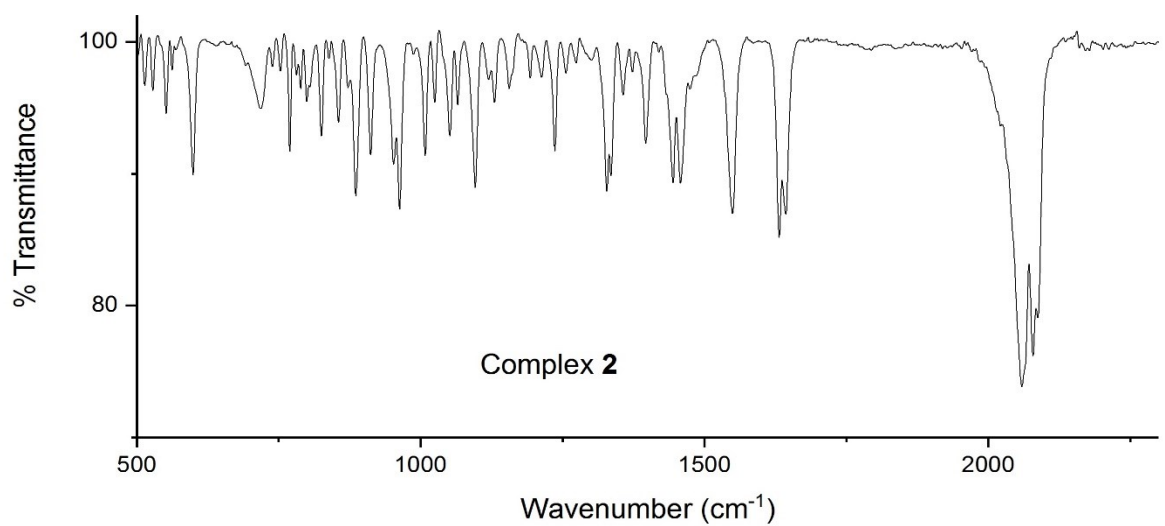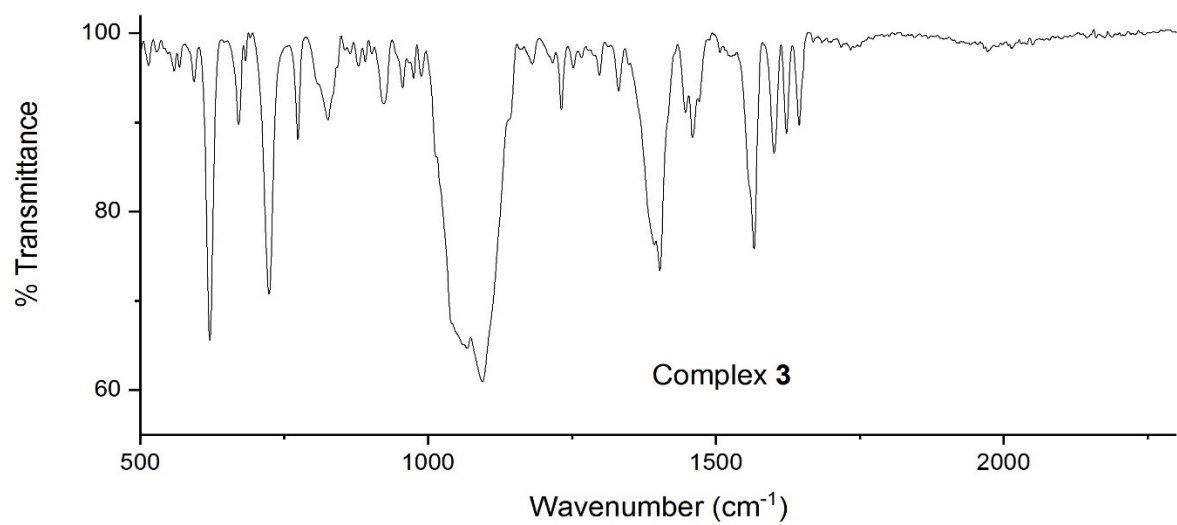

Fig.S1. IR spectra of complexes 1–3.

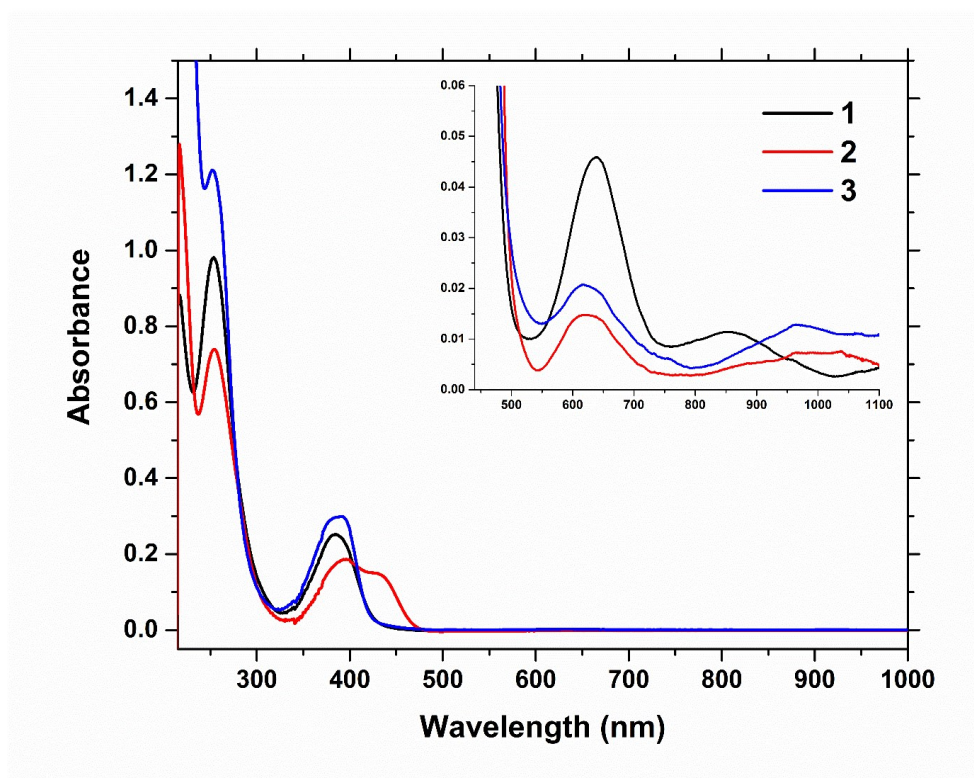

**Fig. S2.** UV-Vis Spectra of the complexes 1–3 at  $[\text{Complex}] = 5 \times 10^{-5}$  (M) whereas the inset spectra were recorded at  $[\text{Complex}] = 1 \times 10^{-3}$  (M).

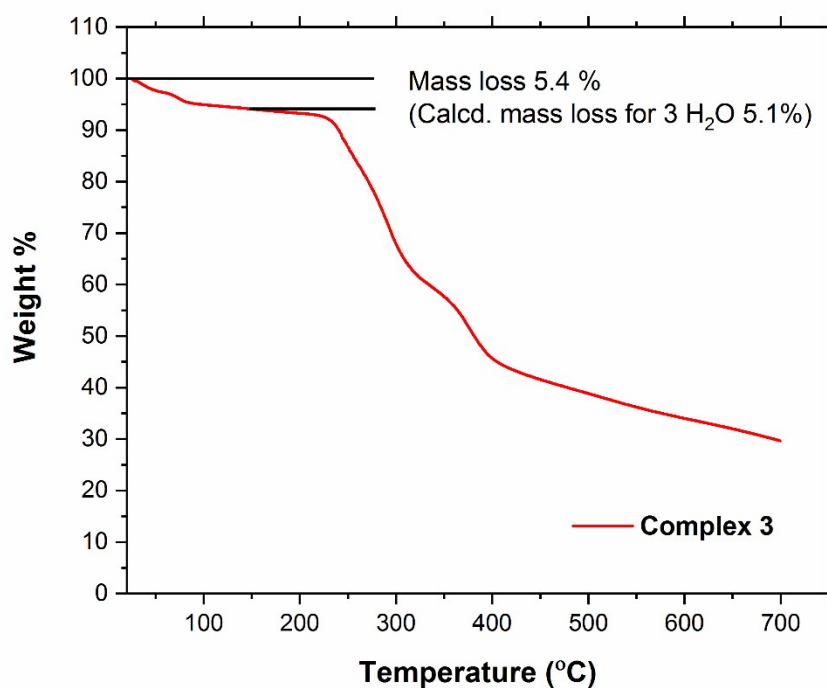

**Fig. S3.** TGA plot for complex 3.

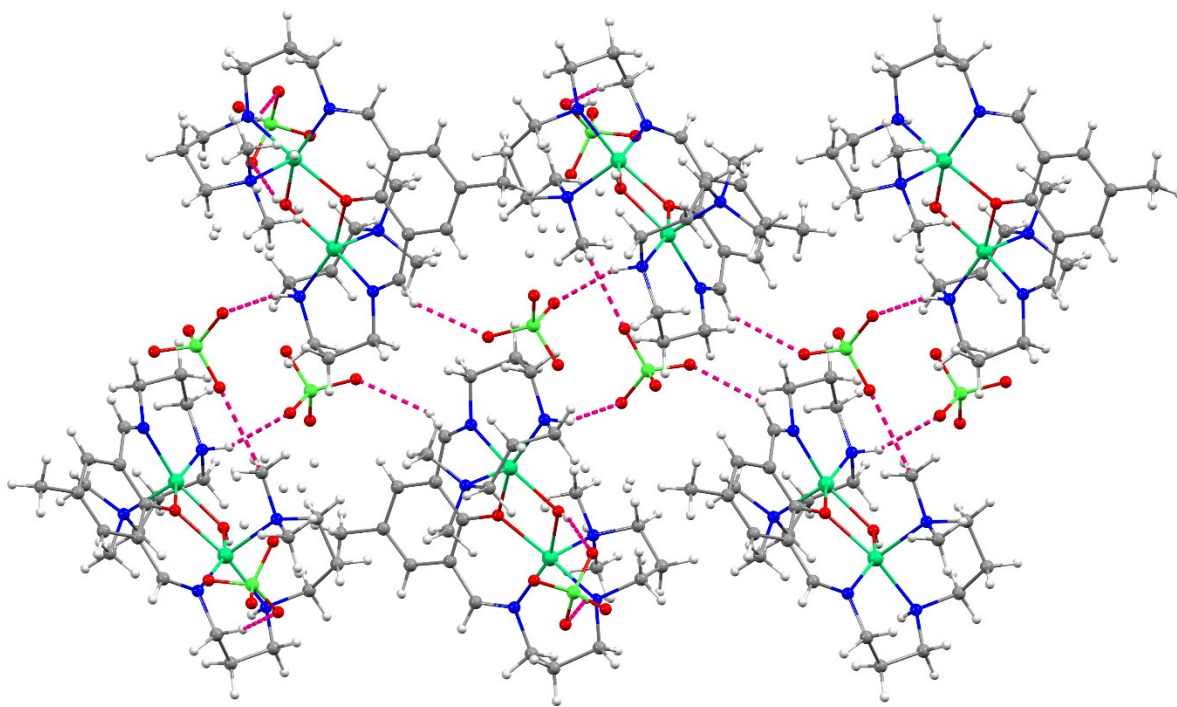

**Fig. S4.** The crystal packing of complex **1** displaying different hydrogen bonding interactions.

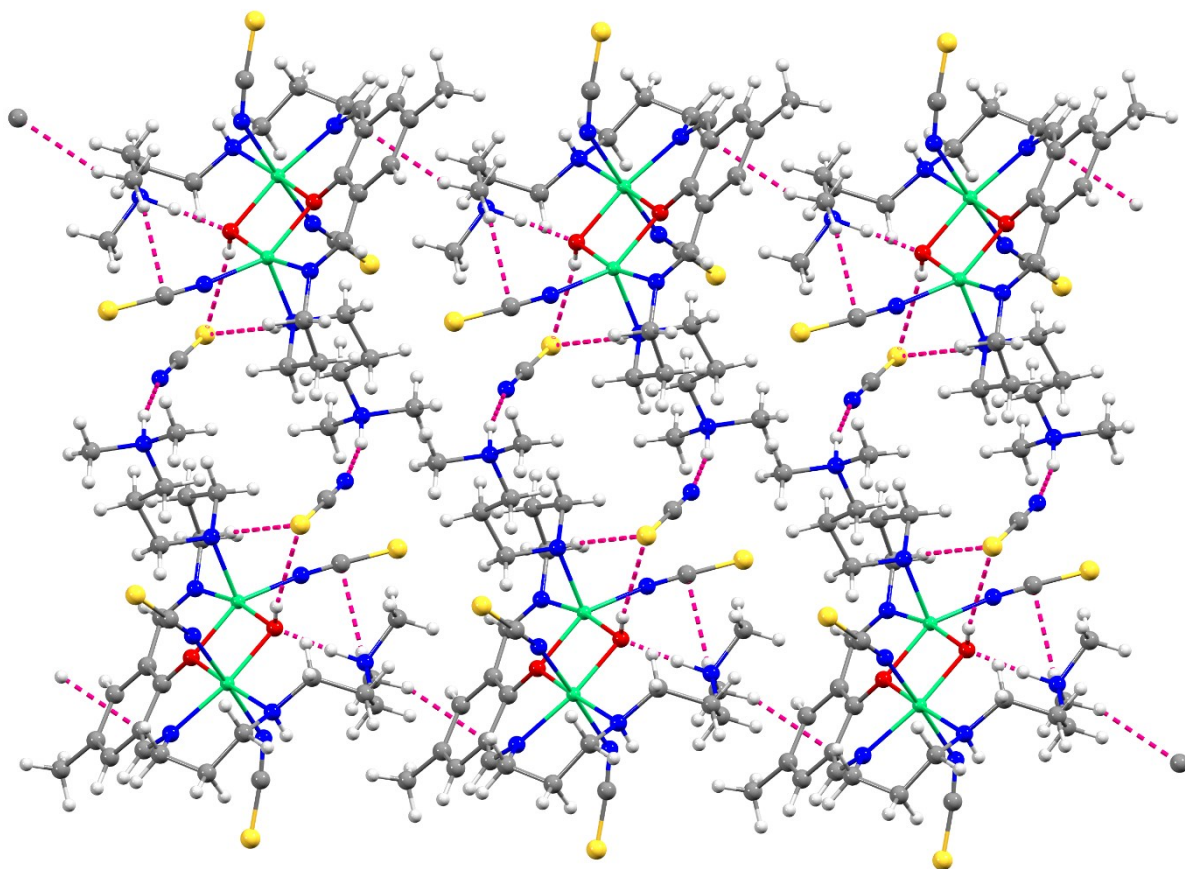

**Fig. S5.** The crystal packing of complex **2** displaying different weak non-covalent interactions.

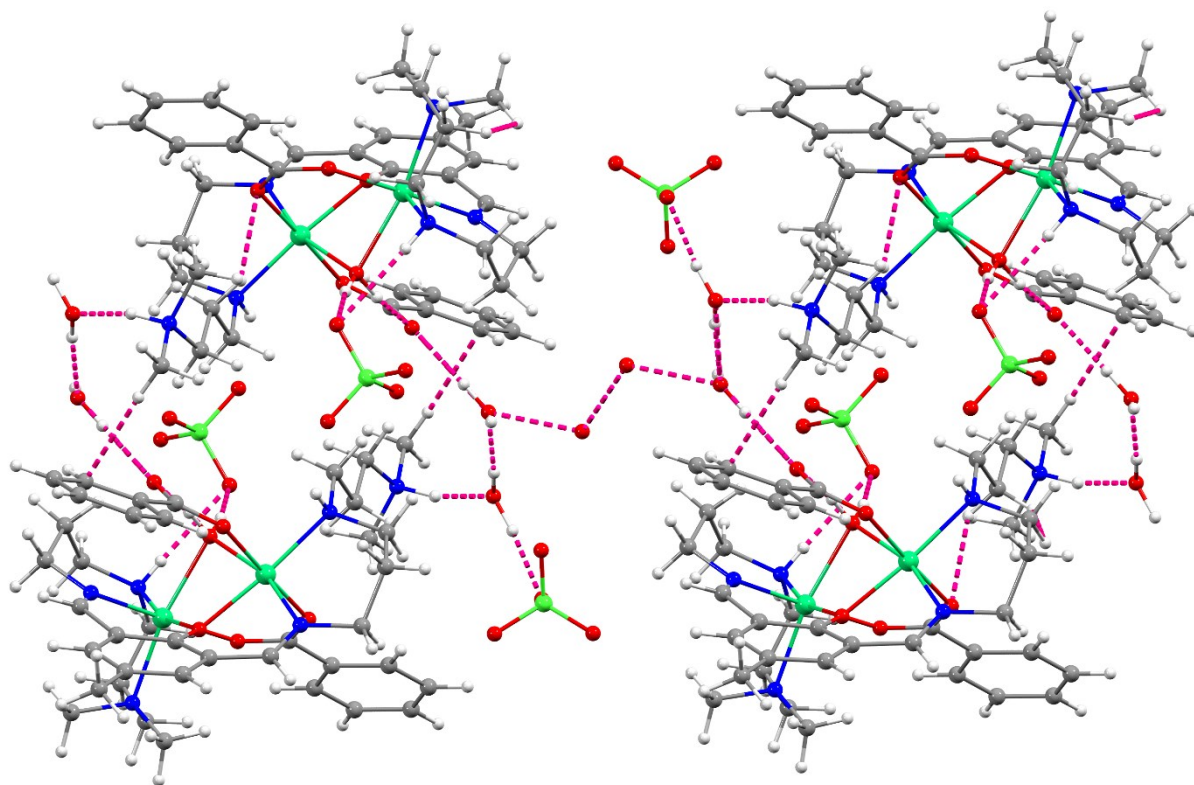

**Fig. S6.** The crystal packing of complex **3** displaying different hydrogen bonding interactions.

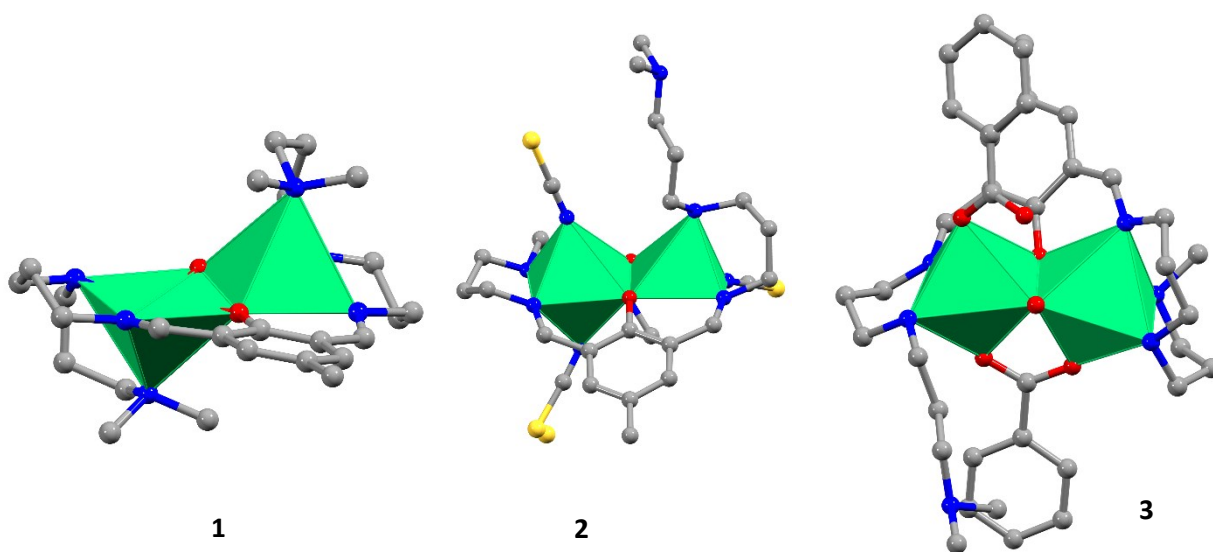

**Fig. S7.** Crystal structures of **1–3** showing edge sharing bi-polyhedral structures and hydrogen atoms have been omitted for clarity.

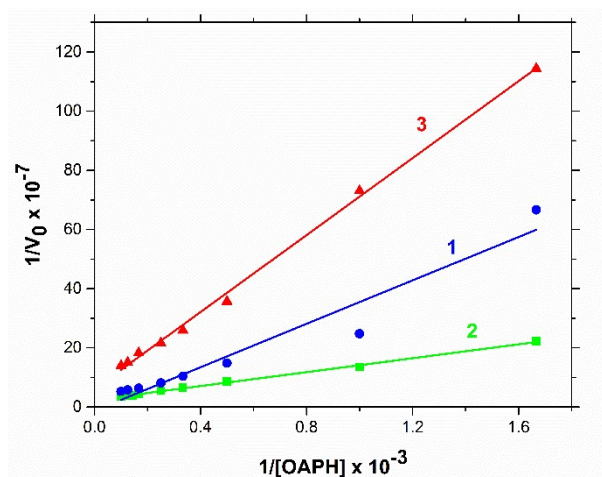

**Fig. S8.** Linear Lineweaver–Burk plots for the oxidation of *o*-aminophenol catalysed by **1-3**. Symbols and solid lines represent experimental and simulated profiles, respectively.

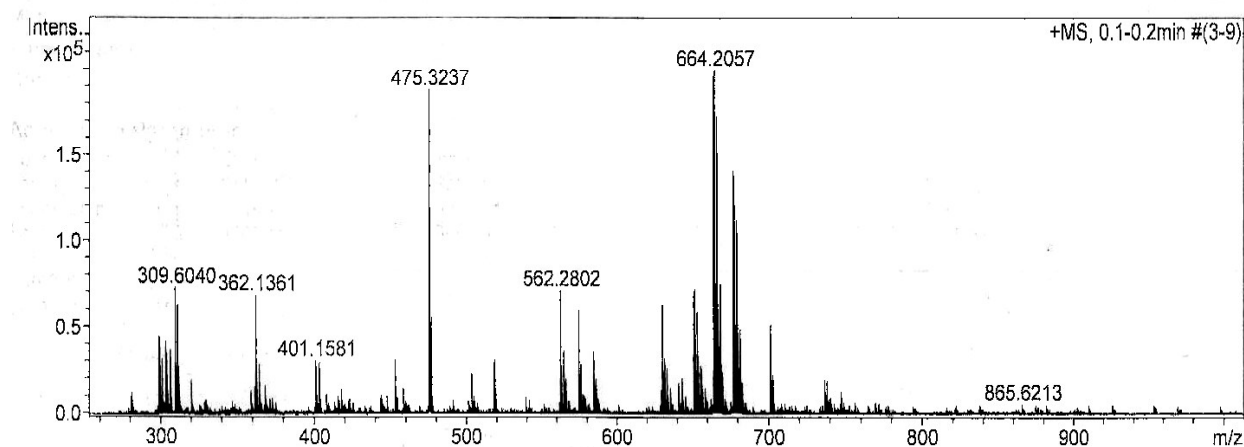

**Fig. S9.** Electrospray ionization mass spectrum (ESI-MS positive) of **2**.

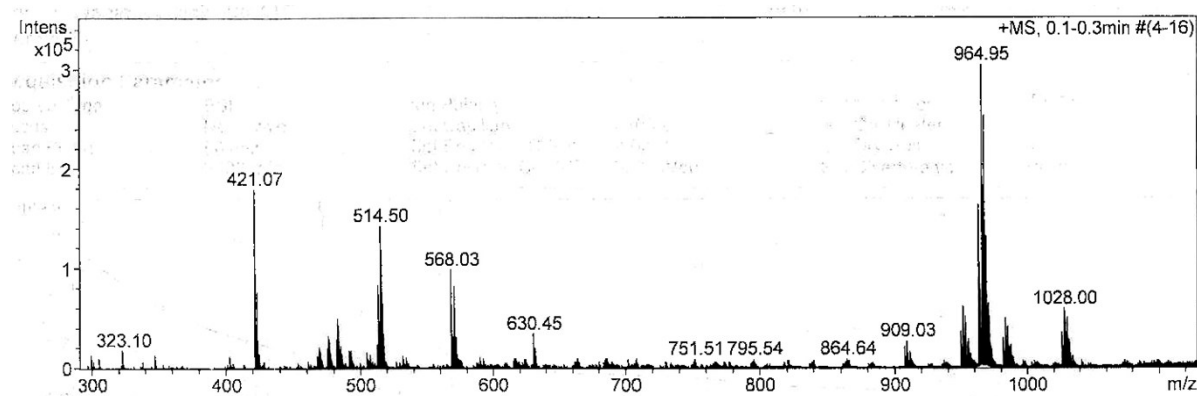

**Fig. S10.** Electrospray ionization mass spectrum (ESI-MS positive) of a 1:50 mixture of **2** and OAPH in methanol recorded after 10 min of mixing.
